# Supplementary material for: Learning Biomarkers of Pluripotent Stem Cells in Mouse
Source: PubMed Central journal article supplement — DNA Res. 2011 Jul 26;18(4):233–51. doi: 10.1093/dnares/dsr016 (PMC3158465; doi:10.1093/dnares/dsr016), 2011-07-26

Search

## EST Profile

[Mm.270762](#) - Gm13051: Predicted gene 13051

### Breakdown by Body Sites

[Mm.270762](#)

|                       |    |             |
|-----------------------|----|-------------|
| adipose tissue        | 0  | 0 / 1564    |
| adrenal gland         | 0  | 0 / 2044    |
| bladder               | 0  | 0 / 13461   |
| blood                 | 0  | 0 / 16832   |
| bone                  | 0  | 0 / 32327   |
| bone marrow           | 0  | 0 / 137491  |
| brain                 | 0  | 0 / 459991  |
| connective tissue     | 0  | 0 / 19790   |
| dorsal root ganglion  | 0  | 0 / 10186   |
| embryonic tissue      | 36 | 24 / 664846 |
| epididymis            | 0  | 0 / 2652    |
| extraembryonic tissue | 0  | 0 / 73200   |
| eye                   | 0  | 0 / 184900  |
| fertilized ovum       | 0  | 0 / 26353   |
| heart                 | 0  | 0 / 52131   |
| inner ear             | 0  | 0 / 37947   |
| intestine             | 0  | 0 / 84236   |
| joint                 | 0  | 0 / 17136   |
| kidney                | 0  | 0 / 122453  |
| liver                 | 0  | 0 / 108957  |
| lung                  | 0  | 0 / 96442   |
| lymph node            | 0  | 0 / 15170   |
| mammary gland         | 0  | 0 / 302624  |
| molar                 | 0  | 0 / 3601    |
| muscle                | 0  | 0 / 27256   |
| nasopharynx           | 0  | 0 / 8067    |
| olfactory mucosa      | 0  | 0 / 3281    |
| ovary                 | 0  | 0 / 53434   |
| oviduct               | 0  | 0 / 3201    |
| pancreas              | 9  | 1 / 105756  |
| pineal gland          | 0  | 0 / 3914    |
| pituitary gland       | 0  | 0 / 16965   |
| prostate              | 0  | 0 / 29888   |
| salivary gland        | 0  | 0 / 19345   |
| skin                  | 0  | 0 / 114950  |
| spinal cord           | 0  | 0 / 21805   |
| spleen                | 0  | 0 / 94430   |
| stomach               | 0  | 0 / 29435   |
| sympathetic ganglion  | 0  | 0 / 9045    |
| testis                | 0  | 0 / 113759  |
| thymus                | 8  | 1 / 116168  |
| thyroid               | 0  | 0 / 8859    |
| tongue                | 0  | 0 / 9861    |
| turbinate             | 0  | 0 / 1383    |

|                 |   |          |
|-----------------|---|----------|
| uterus          | 0 | 0 / 6842 |
| vagina          | 0 | 0 / 5171 |
| vesicular gland | 0 | 0 / 2187 |

**Breakdown by Developmental Stage**

Mm.270762

|                   |    |            |
|-------------------|----|------------|
| oocyte            | 0  | 0 / 19423  |
| unfertilized ovum | 0  | 0 / 19710  |
| zygote            | 0  | 0 / 27241  |
| cleavage          | 0  | 0 / 27056  |
| morula            | 0  | 0 / 37647  |
| blastocyst        | 43 | 3 / 69305  |
| egg cylinder      | 0  | 0 / 12083  |
| gastrula          | 0  | 0 / 27624  |
| organogenesis     | 47 | 6 / 125372 |
| fetus             | 3  | 2 / 653835 |
| neonate           | 0  | 0 / 103512 |
| juvenile          | 3  | 1 / 291299 |
| adult             | 0  | 0 / 995094 |

EST profiles show **approximate** gene expression patterns as inferred from EST counts and the cDNA library sources (as reported by sequence submitters). Libraries known to be normalized, subtracted, or otherwise biased have been removed, but for a variety of reasons, EST counts may not be a true indication of gene activity.

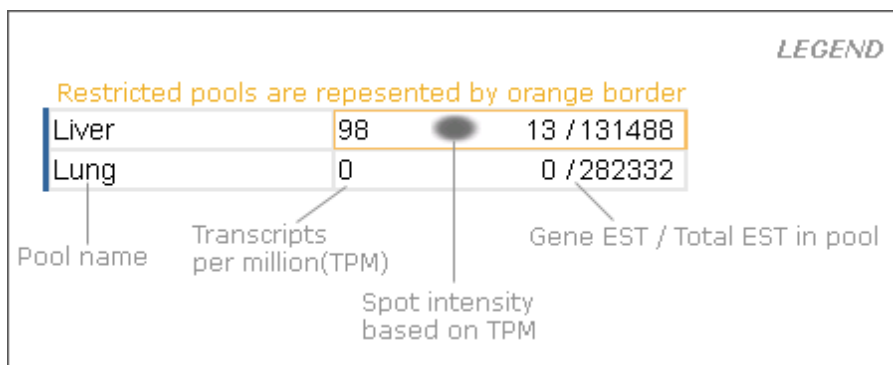

**Questions or Comments?**

E-mail the NCBI Help Desk

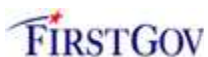

National Center for Biotechnology Information  
U.S. National Library of Medicine  
National Institutes of Health

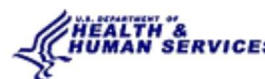

Supplement: supp_dsr016_dsr016supp3.pdf [file supp_dsr016_dsr016supp3.pdf]
