# Supplementary material for: Learning Biomarkers of Pluripotent Stem Cells in Mouse
Source: PubMed Central journal article supplement — DNA Res. 2011 Jul 26;18(4):233–51. doi: 10.1093/dnares/dsr016 (PMC3158465; doi:10.1093/dnares/dsr016), 2011-07-26
Supplement: supp_dsr016_dsr016supp1.pdf [file supp_dsr016_dsr016supp1.pdf]

## GEO Datasets

**GSE3653** Inducible Ngn3 Embryonic Stem Cells [21]

| sample   | description             | label |
|----------|-------------------------|-------|
| GSM85006 | Ainv15 EB10 replicate 1 | -     |
| GSM85007 | Ainv15 EB10 replicate 2 | -     |
| GSM85008 | Ainv15 ES0 replicate 1  | +     |
| GSM85009 | Ainv15 ES0 replicate 2  | +     |

**GSE4189** The Oct4 and Nanog transcription network that regulates pluripotency in mouse embryonic stem cells [14]

| sample   | description                              | label |
|----------|------------------------------------------|-------|
| GSM94856 | Parental vector, pSUPER-puro replicate 1 | +     |
| GSM94857 | Parental vector, pSUPER-puro replicate 2 | +     |
| GSM94858 | Parental vector, pSUPER-puro replicate 3 | +     |
| GSM94859 | Parental vector, pSUPER-puro replicate 4 | +     |
| GSM94860 | Parental vector, pSUPER-puro replicate 5 | +     |

**GSE4309** An improved single-cell cDNA amplification method for efficient high-density oligo-nucleotide microarray analysis [11]

| sample   | description                                 | label |
|----------|---------------------------------------------|-------|
| GSM98548 | single cell from ICM E3.5, biological rep1  | +     |
| GSM98549 | single cell from ICM E3.5, biological rep2  | +     |
| GSM98550 | single cell from ICM E3.5, biological rep3  | +     |
| GSM98551 | single cell from ICM E3.5, biological rep4  | +     |
| GSM98552 | single cell from ICM E3.5, biological rep5  | +     |
| GSM98553 | single cell from ICM E3.5, biological rep6  | +     |
| GSM98554 | single cell from ICM E3.5, biological rep7  | +     |
| GSM98555 | single cell from ICM E3.5, biological rep8  | +     |
| GSM98556 | single cell from ICM E3.5, biological rep9  | +     |
| GSM98557 | single cell from ICM E3.5, biological rep10 | +     |
| GSM98558 | single cell from ICM E3.5, biological rep11 | +     |
| GSM98559 | single cell from ICM E3.5, biological rep12 | +     |
| GSM98560 | single cell from ICM E3.5, biological rep13 | +     |
| GSM98561 | single cell from ICM E3.5, biological rep14 | +     |
| GSM98562 | single cell from ICM E3.5, biological rep15 | +     |
| GSM98563 | single cell from ICM E3.5, biological rep16 | +     |
| GSM98564 | single cell from ICM E3.5, biological rep17 | +     |
| GSM98565 | single cell from ICM E3.5, biological rep18 | +     |
| GSM98566 | single cell from ICM E3.5, biological rep19 | +     |
| GSM98567 | single cell from ICM E3.5, biological rep20 | +     |
| GSM98568 | ES 10pg amplified, technical rep1           | +     |
| GSM98569 | ES 10pg amplified, technical rep2           | +     |
| GSM98570 | ES 10pg amplified, technical rep3           | +     |
| GSM98571 | ES 10pg amplified, technical rep4           | +     |
| GSM98572 | ES 10pg amplified, technical rep5           | +     |
| GSM98573 | ES 10pg amplified, technical rep6           | +     |
| GSM98574 | ES 10pg amplified, technical rep7           | +     |
| GSM98575 | ES 10pg amplified, technical rep8           | +     |
| GSM98576 | ES 5ug nonamplified, technical rep1         | +     |
| GSM98577 | ES 5ug nonamplified, technical rep2         | +     |

|          |                                     |   |
|----------|-------------------------------------|---|
| GSM98578 | ES 5ug nonamplified, technical rep3 | + |
| GSM98579 | ES 5ug nonamplified, technical rep4 | + |
| GSM98580 | ES 5ug nonamplified, technical rep5 | + |
| GSM98581 | ES 5ug nonamplified, technical rep6 | + |
| GSM98582 | ES 5ug nonamplified, technical rep7 | + |
| GSM98583 | ES 5ug nonamplified, technical rep8 | + |

**GSE6933** Unique Molecular Signature of Multipotent Adult Progenitor Cells [22]

| sample    | description | label |
|-----------|-------------|-------|
| GSM144622 | MSC A Affy  | -     |
| GSM144623 | MSC B Affy  | -     |
| GSM144624 | MSC C Affy  | -     |
| GSM144634 | ESC A Affy  | +     |
| GSM144635 | ESC B Affy  | +     |
| GSM144636 | ESC C Affy  | +     |

**GSE7688** Genome-wide mapping and analysis of active promoters in mouse ES cells and adult organs [1]

| sample    | description                                                 | label |
|-----------|-------------------------------------------------------------|-------|
| GSM185509 | Affymetrix Gene Expression profiling of adult mouse brain   | -     |
| GSM185510 | Affymetrix Gene Expression profiling of adult mouse heart   | -     |
| GSM185511 | Affymetrix Gene Expression profiling of adult mouse kidney  | -     |
| GSM185512 | Affymetrix Gene Expression profiling of adult mouse liver   | -     |
| GSM185513 | Affymetrix Gene Expression profiling of mouse ES cells (R1) | +     |

**GSE8024** Murine ES cells, neural precursor cells and embryonic fibroblasts [17]

| sample    | description | label |
|-----------|-------------|-------|
| GSM198062 | ES wt rep1  | +     |
| GSM198063 | ES wt rep2  | +     |
| GSM198064 | ES wt rep3  | +     |
| GSM198065 | NPC wt rep1 | -     |
| GSM198066 | NPC wt rep2 | -     |
| GSM198067 | NPC wt rep3 | -     |
| GSM198070 | MEF wt rep1 | -     |
| GSM198072 | MEF wt rep2 | -     |

**GSE9244** WT vs Klf5 KO ES [2]

| sample    | description         | label |
|-----------|---------------------|-------|
| GSM234772 | Mouse WT ES clone 1 | +     |
| GSM234773 | Mouse WT ES clone 2 | +     |

**GSE9563** Translation state array analysis of Mouse embryonic stem cells and embryoid bodies [19]

| sample    | description                                     | label |
|-----------|-------------------------------------------------|-------|
| GSM241847 | ESC, Undifferentiated, Pool-1, Biological Rep-1 | +     |
| GSM241848 | ESC, Undifferentiated, Pool-1, Biological Rep-2 | +     |
| GSM241849 | ESC, Undifferentiated, Pool-1, Biological Rep-3 | +     |
| GSM241850 | ESC, Undifferentiated, Pool-2, Biological Rep-1 | +     |

|           |                                                   |   |
|-----------|---------------------------------------------------|---|
| GSM241851 | ESC, Undifferentiated, Pool-2, Biological Rep-2   | + |
| GSM241852 | ESC, Undifferentiated, Pool-2, Biological Rep-3   | + |
| GSM241853 | ESC, Undifferentiated, Pool-3, Biological Rep-1   | + |
| GSM241854 | ESC, Undifferentiated, Pool-3, Biological Rep-2   | + |
| GSM241855 | ESC, Undifferentiated, Pool-3, Biological Rep-3   | + |
| GSM241856 | ESC, Undifferentiated, Pool-4, Biological Rep-1   | + |
| GSM241857 | ESC, Undifferentiated, Pool-4, Biological Rep-2   | + |
| GSM241858 | ESC, Undifferentiated, Pool-4, Biological Rep-3   | + |
| GSM241859 | EB, Pool-1, Biological Rep-1                      | - |
| GSM241860 | EB, Pool-1, Biological Rep-2                      | - |
| GSM241861 | EB, Pool-1, Biological Rep-3                      | - |
| GSM241862 | EB, Pool-2, Biological Rep-1                      | - |
| GSM241863 | EB, Pool-2, Biological Rep-2                      | - |
| GSM241864 | EB, Pool-2, Biological Rep-3                      | - |
| GSM241865 | EB, Pool-3, Biological Rep-1                      | - |
| GSM241866 | EB, Pool-3, Biological Rep-2                      | - |
| GSM241867 | EB, Pool-3, Biological Rep-3                      | - |
| GSM241868 | EB, Pool-4, Biological Rep-1                      | - |
| GSM241869 | EB, Pool-4, Biological Rep-2                      | - |
| GSM241870 | EB, Pool-4, Biological Rep-3                      | - |
| GSM241871 | Total RNA ESC, Undifferentiated, Biological Rep-1 | + |
| GSM241872 | Total RNA ESC, Undifferentiated, Biological Rep-2 | + |
| GSM241873 | Total RNA ESC, Undifferentiated, Biological Rep-3 | + |
| GSM241874 | Total RNA EB, Biological Rep-1                    | - |
| GSM241875 | Total RNA EB, Biological Rep-2                    | - |
| GSM241876 | Total RNA EB, Biological Rep-3                    | - |

**GSE9954** Large-scale analysis of the mouse transcriptome [20]

| sample    | description                                 | label |
|-----------|---------------------------------------------|-------|
| GSM252064 | Mouse diaphragm, biological replicate 1     | -     |
| GSM252065 | Mouse diaphragm, biological replicate 2     | -     |
| GSM252066 | Mouse diaphragm, biological replicate 3     | -     |
| GSM252067 | Mouse spleen, biological replicate 1        | -     |
| GSM252068 | Mouse spleen, biological replicate 2        | -     |
| GSM252069 | Mouse spleen, biological replicate 3        | -     |
| GSM252070 | Mouse muscle, biological replicate 1        | -     |
| GSM252071 | Mouse muscle, biological replicate 2        | -     |
| GSM252072 | Mouse muscle, biological replicate 3        | -     |
| GSM252073 | Mouse muscle, biological replicate 4        | -     |
| GSM252074 | Mouse liver, biological replicate 1         | -     |
| GSM252075 | Mouse liver, biological replicate 2         | -     |
| GSM252076 | Mouse liver, biological replicate 3         | -     |
| GSM252077 | Mouse brain, biological replicate 1         | -     |
| GSM252078 | Mouse brain, biological replicate 2         | -     |
| GSM252079 | Mouse brain, biological replicate 3         | -     |
| GSM252080 | Mouse lung, biological replicate 1          | -     |
| GSM252081 | Mouse lung, biological replicate 2          | -     |
| GSM252082 | Mouse lung, biological replicate 3          | -     |
| GSM252083 | Mouse kidney, biological replicate 1        | -     |
| GSM252084 | Mouse kidney, biological replicate 2        | -     |
| GSM252085 | Mouse kidney, biological replicate 3        | -     |
| GSM252086 | Mouse adrenal gland, biological replicate 1 | -     |
| GSM252087 | Mouse adrenal gland, biological replicate 2 | -     |

|           |                                               |   |
|-----------|-----------------------------------------------|---|
| GSM252088 | Mouse adrenal gland, biological replicate 3   | - |
| GSM252089 | Mouse bone marrow, biological replicate 1     | - |
| GSM252090 | Mouse bone marrow, biological replicate 2     | - |
| GSM252091 | Mouse bone marrow, biological replicate 3     | - |
| GSM252092 | Mouse bone marrow, biological replicate 4     | - |
| GSM252093 | Mouse adipose tissue, biological replicate 1  | - |
| GSM252094 | Mouse adipose tissue, biological replicate 2  | - |
| GSM252095 | Mouse adipose tissue, biological replicate 3  | - |
| GSM252096 | Mouse pituitary gland, biological replicate 1 | - |
| GSM252097 | Mouse pituitary gland, biological replicate 2 | - |
| GSM252098 | Mouse pituitary gland, biological replicate 3 | - |
| GSM252099 | Mouse pituitary gland, biological replicate 4 | - |
| GSM252100 | Mouse pituitary gland, biological replicate 5 | - |
| GSM252101 | Mouse salivary gland, biological replicate 1  | - |
| GSM252102 | Mouse salivary gland, biological replicate 2  | - |
| GSM252103 | Mouse salivary gland, biological replicate 3  | - |
| GSM252104 | Mouse seminal vesicle, biological replicate 1 | - |
| GSM252105 | Mouse seminal vesicle, biological replicate 2 | - |
| GSM252106 | Mouse seminal vesicle, biological replicate 3 | - |
| GSM252107 | Mouse thymus, biological replicate 1          | - |
| GSM252108 | Mouse thymus, biological replicate 2          | - |
| GSM252109 | Mouse thymus, biological replicate 3          | - |
| GSM252110 | Mouse testis, biological replicate 1          | - |
| GSM252111 | Mouse testis, biological replicate 2          | - |
| GSM252112 | Mouse testis, biological replicate 3          | - |
| GSM252113 | Mouse heart, biological replicate 1           | - |
| GSM252114 | Mouse heart, biological replicate 2           | - |
| GSM252115 | Mouse heart, biological replicate 3           | - |
| GSM252116 | Mouse small intestine, biological replicate 1 | - |
| GSM252117 | Mouse small intestine, biological replicate 2 | - |
| GSM252118 | Mouse small intestine, biological replicate 3 | - |
| GSM252119 | Mouse eye, biological replicate 1             | - |
| GSM252120 | Mouse eye, biological replicate 2             | - |
| GSM252121 | Mouse eye, biological replicate 3             | - |
| GSM252122 | Mouse ES cells, biological replicate 1        | + |
| GSM252123 | Mouse ES cells, biological replicate 2        | + |
| GSM252124 | Mouse ES cells, biological replicate 3        | + |
| GSM252125 | Mouse placenta, biological replicate 1        | - |
| GSM252126 | Mouse placenta, biological replicate 2        | - |
| GSM252127 | Mouse placenta, biological replicate 3        | - |
| GSM252128 | Mouse ovary, biological replicate 1           | - |
| GSM252129 | Mouse ovary, biological replicate 2           | - |
| GSM252130 | Mouse ovary, biological replicate 3           | - |
| GSM252131 | Mouse fetus, biological replicate 1           | - |
| GSM252132 | Mouse fetus, biological replicate 2           | - |
| GSM252133 | Mouse fetus, biological replicate 3           | - |

**GSE10573** Superseries Endoh2008 PcG Pou5f1 [3]

| sample    | description                                                                    | label |
|-----------|--------------------------------------------------------------------------------|-------|
| GSM265040 | Gene expression of mouse ES cells, control of constitutive Ring1B KO           | +     |
| GSM265042 | Gene expression of mouse ES cell, control of Ring1A/B double KO                | +     |
| GSM266065 | Gene expression of mouse ES cells, control of Gata6 overexpression experiments | +     |

**GSE10610** Expression data from mouse germline stem (GS), multipotent germline stem (mGS), and embryonic stem (ES) cells. [7]

| sample    | description | label |
|-----------|-------------|-------|
| GSM267413 | GS          | -     |
| GSM267415 | ES          | +     |

**GSE10776** Expression profiles of Embryonic stem cells derived from normal fertilization and parthenogenesis

| sample    | description                                                                                  | label |
|-----------|----------------------------------------------------------------------------------------------|-------|
| GSM272035 | embryonic stem cells derived from normal fertilization of female C57BL6 and male DBA2 mice 2 | +     |
| GSM272036 | embryonic stem cells derived from normal fertilization of female C57BL6 and male DBA2 mice 4 | +     |
| GSM272037 | embryonic stem cells derived from normal fertilization of female C57BL6 and male DBA2 mice 3 | +     |
| GSM272052 | R1 embryonic stem cells 3                                                                    | +     |
| GSM272053 | R1 embryonic stem cells 4                                                                    | +     |
| GSM272054 | R1 embryonic stem cells 5                                                                    | +     |

**GSE10806** Pluripotent stem cells induced from adult neural stem cells by reprogramming with two factors [9]

| sample    | description                                                             | label |
|-----------|-------------------------------------------------------------------------|-------|
| GSM272753 | Embryonic Stem cells sample 1                                           | +     |
| GSM272836 | Embryonic Stem cells sample 2                                           | +     |
| GSM272837 | Embryonic Stem cells sample 3                                           | +     |
| GSM272839 | Induced pluripotent stem (iPS) cells (Oct4, Klf4) sample 2              | +     |
| GSM272846 | Induced pluripotent stem (iPS) cells (Oct4, Klf4) sample 3              | +     |
| GSM272847 | Neural stem cells (NSC) sample 2                                        | -     |
| GSM272848 | Neural Stem cells (NSC) sample 3                                        | -     |
| GSM272890 | Induced pluripotent stem (iPS) cells (Oct4, Klf4) sample 1              | +     |
| GSM279200 | Induced pluripotent stem (iPS) cells (Oct4, Sox2, c-Myc, Klf4) sample 1 | +     |
| GSM279201 | Induced pluripotent stem (iPS) cells (Oct4, Sox2, c-Myc, Klf4) sample 2 | +     |
| GSM279202 | Induced pluripotent stem (iPS) cells (Oct4, Sox2, c-Myc, Klf4) sample 3 | +     |

**GSE10871** Differentiated, partially- and fully-reprogrammed MEFs/B-cells [16]

| sample    | description                                                    | label |
|-----------|----------------------------------------------------------------|-------|
| GSM275544 | Partially reprogrammed cell line MCV8 (SSEA+) replicate 1      | -     |
| GSM275546 | Partially reprogrammed cell line MCV8 (SSEA+) replicate 2      | -     |
| GSM275547 | Partially reprogrammed cell line MCV8 (SSEA-) replicate 1      | -     |
| GSM275548 | Partially reprogrammed cell line MCV8 (SSEA-) replicate 2      | -     |
| GSM275551 | Partially reprogrammed cell line MCV8 (Low MHC) replicate 1    | -     |
| GSM275552 | Partially reprogrammed cell line MCV8 (low MHC) replicate 2    | -     |
| GSM275554 | Partially reprogrammed cell line MCV8 (medium MHC) replicate 1 | -     |
| GSM275555 | Partially reprogrammed cell line MCV8 (Medium MHC) replicate 2 | -     |
| GSM275556 | Partially reprogrammed cell line MCV8 (High MHC) replicate 1   | -     |
| GSM275557 | Partially reprogrammed cell line MCV8 (High MHC) replicate 2   | -     |
| GSM275558 | Partially reprogrammed cell line BIV1 (Dox+) replicate 1       | -     |

|           |                                                          |   |
|-----------|----------------------------------------------------------|---|
| GSM275560 | Partially reprogrammed cell line BIV1 (Dox+) replicate 2 | - |
| GSM275561 | Partially reprogrammed cell line BIV1 (Dox-) replicate 1 | - |
| GSM275562 | Partially reprogrammed cell line BIV1 (Dox-) replicate 2 | - |
| GSM275563 | Partially reprogrammed cell line MCV6 replicate 1        | - |
| GSM275564 | Partially reprogrammed cell line MCV6 replicate 2        | - |
| GSM275566 | B-iPS replicate 1                                        | + |
| GSM275567 | B-iPS replicate 2                                        | + |
| GSM275580 | Oct4-iPS cell line MCV8.1 (replicate 1)                  | + |
| GSM275581 | Oct4-iPS cell line MCV8.1 (replicate 2)                  | + |

**GSE10970** Efficient Array-based Identification of Novel Cardiac Genes through Differentiation of Mouse ESCs [18]

| sample    | description     | label |
|-----------|-----------------|-------|
| GSM277757 | Day 0 1a        | +     |
| GSM277758 | Day 0 2a        | +     |
| GSM277759 | Day 0 3a        | +     |
| GSM277760 | Day 4 1a        | -     |
| GSM277761 | Day 4 2a        | -     |
| GSM277762 | Day 4 3a        | -     |
| GSM277763 | Day 6 GFPpos 1a | -     |
| GSM277764 | Day 6 GFPpos 2a | -     |
| GSM277765 | Day 6 GFPpos 3a | -     |
| GSM277766 | Day 6 GFPneg 1a | -     |
| GSM277767 | Day 6 GFPneg 2a | -     |
| GSM277768 | Day 6 GFPneg 3a | -     |

**GSE11274** Induction of Pluripotency in Adult Unipotent Germline Stem Cells [10]

| sample    | description                                       | label |
|-----------|---------------------------------------------------|-------|
| GSM284788 | Germline stem cells (GSC 1) sample 1              | -     |
| GSM284789 | Germline stem cells (GSC 2) sample 2              | -     |
| GSM284790 | Germline stem cells (GSC 3) sample 3              | -     |
| GSM284791 | Germline pluripotent stem cells (gPSC 1) sample 1 | +     |
| GSM284792 | Germline pluripotent stem cells (gPSC 2) sample 2 | +     |
| GSM284793 | Germline pluripotent stem cells (gPSC 3) sample 3 | +     |
| GSM284794 | Germline pluripotent stem cells (gPSC 4) sample 4 | +     |
| GSM284795 | Germline pluripotent stem cells (gPSC 5) sample 5 | +     |
| GSM284796 | Neural stem cells (NSC 1) sample 1                | -     |
| GSM284797 | Neural stem cells (NSC 2) sample 2                | -     |
| GSM284798 | Neural stem cells (NSC 3) sample 3                | -     |
| GSM284799 | Mouse embryonic fibroblasts (MEF 1) sample 1      | -     |
| GSM284800 | Mouse embryonic fibroblasts (MEF 2) sample 2      | -     |
| GSM284801 | Mouse embryonic fibroblasts (MEF 3) sample 3      | -     |
| GSM284805 | Embryonic stem cells (ESC 1) sample 1             | +     |
| GSM284806 | Embryonic stem cells (ESC 2) sample 2             | +     |
| GSM284807 | Embryonic stem cells (ESC 3) sample 3             | +     |

**GSE12499** Oct4-Induced Pluripotency in Adult Neural Stem Cells [8]

| sample    | description                                          | label |
|-----------|------------------------------------------------------|-------|
| GSM314038 | NSCs-derived iPS cells by one-factor (Oct4) sample 1 | +     |
| GSM314039 | NSCs-derived iPS cells by one-factor (Oct4) sample 2 | +     |

|           |                                                      |   |
|-----------|------------------------------------------------------|---|
| GSM314040 | NSCs-derived iPS cells by one-factor (Oct4) sample 3 | + |
| GSM314042 | One-factor (Oct4) iPS cell-derived NSCs sample 1     | - |
| GSM314043 | One-factor (Oct4) iPS cell-derived NSCs sample 2     | - |
| GSM314044 | One-factor (Oct4) iPS cell-derived NSCs sample 3     | - |
| GSM314045 | Neural stem cell sample 1                            | - |
| GSM314046 | Neural stem cell sample 2                            | - |
| GSM314047 | Neural stem cell sample 3                            | - |
| GSM314048 | Neural stem cell sample 4                            | - |

**GSE13408** Cell cycle exit and terminal differentiation independent of the Rb gene family during embryonic development

| sample    | description  | label |
|-----------|--------------|-------|
| GSM338369 | WT ESC (B21) | +     |
| GSM338371 | WT ESC (J1)  | +     |
| GSM338373 | WT ESC (R1)  | +     |

**GSE13805** Expression data from wild type and calreticulin deficient murine embryonic stem cells. [4]

| sample    | description                                          | label |
|-----------|------------------------------------------------------|-------|
| GSM347150 | Wild type mouse embryonic stem cell, biological rep1 | +     |
| GSM347151 | Wild type mouse embryonic stem cell, biological rep2 | +     |

**GSE15173** Dppa4 is dispensable for embryonic stem cell identity and germ cell development, but essential for embryogenesis [15]

| sample    | description        | label |
|-----------|--------------------|-------|
| GSM378796 | CI#84.2 replicate1 | +     |
| GSM378797 | CI#84.2 replicate2 | +     |
| GSM378798 | CI#84.2 replicate3 | +     |

**GSE15267** Expression data of induced pluripotent stem cell

| sample    | description                      | label |
|-----------|----------------------------------|-------|
| GSM381301 | embryonic stem cell line CGR8    | +     |
| GSM381304 | embryonic stem cell line R1      | +     |
| GSM381305 | 4F-serumfree iPS cell line S2C12 | +     |
| GSM381306 | 4F-serumfree iPS cell line S2C16 | +     |
| GSM381307 | 3F-serumfree iPS cell line S53C1 | +     |
| GSM381308 | 3F-serumfree iPS cell line S53C5 | +     |

**GSE17879** Activin/Nodal signaling in mouse embryonic stem cells [6]

| sample    | description         | label |
|-----------|---------------------|-------|
| GSM446645 | control ES cells #1 | +     |
| GSM446646 | control ES cells #2 | +     |

**GSE19076** Expression data from wild type, Ring1B<sup>-/-</sup>, Eed<sup>-/-</sup>, and Ring1B/Eed double deficient mouse ES cells [12]

| sample | description | label |
|--------|-------------|-------|
|--------|-------------|-------|

|           |                                            |   |
|-----------|--------------------------------------------|---|
| GSM472235 | wild type ES cells, biological replicate 1 | + |
| GSM472236 | wild type ES cells, biological replicate 2 | + |
| GSM472237 | wild type ES cells, biological replicate 3 | + |

**GSE20527** Effect of BMP4 and noggin on gene expression in murine R1 ES cells [5]

| sample    | description | label |
|-----------|-------------|-------|
| GSM515594 | Control     | +     |

**GSE21515** Expression data from mouse ES and iPS cells [13]

| sample    | description                     | label |
|-----------|---------------------------------|-------|
| GSM537473 | ES and iPS cells R1-rep1        | +     |
| GSM537474 | ES and iPS cells R1-rep2        | +     |
| GSM537475 | ES and iPS cells R1-rep3        | +     |
| GSM537476 | ES and iPS cells ESC2-rep1      | +     |
| GSM537477 | ES and iPS cells ESC2-rep2      | +     |
| GSM537478 | ES and iPS cells ESC2-rep3      | +     |
| GSM537479 | ES and iPS cells IP14D-1-rep1   | +     |
| GSM537480 | ES and iPS cells IP14D-1-rep2   | +     |
| GSM537481 | ES and iPS cells IP14D-1-rep3   | +     |
| GSM537482 | ES and iPS cells IP14D-101-rep1 | +     |
| GSM537483 | ES and iPS cells IP14D-101-rep2 | +     |
| GSM537484 | ES and iPS cells IP14D-101-rep3 | +     |
| GSM537485 | ES and iPS cells IP20D-3-rep1   | +     |
| GSM537486 | ES and iPS cells IP20D-3-rep2   | +     |
| GSM537487 | ES and iPS cells IP20D-3-rep3   | +     |
| GSM537488 | ES and iPS cells IP36D-3-rep1   | +     |
| GSM537489 | ES and iPS cells IP36D-3-rep2   | +     |
| GSM537490 | ES and iPS cells IP36D-3-rep3   | +     |

## Literatur

- [1] L. O. Barrera, Z. Li, A. D. Smith, K. C. Arden, W. K. Cavenee, M. Q. Zhang, R. D. Green, and B. Ren. Genome-wide mapping and analysis of active promoters in mouse embryonic stem cells and adult organs. *Genome Res.*, 18:46–59, Jan 2008.
- [2] M. Ema, D. Mori, H. Niwa, Y. Hasegawa, Y. Yamanaka, S. Hitoshi, J. Mimura, Y. Kawabe, T. Hosoya, M. Morita, D. Shimosato, K. Uchida, N. Suzuki, J. Yanagisawa, K. Sogawa, J. Rossant, M. Yamamoto, S. Takahashi, and Y. Fujii-Kuriyama. Krppel-like factor 5 is essential for blastocyst development and the normal self-renewal of mouse ESCs. *Cell Stem Cell*, 3:555–567, Nov 2008.
- [3] M. Endoh, T. A. Endo, T. Endoh, Y. Fujimura, O. Ohara, T. Toyoda, A. P. Otte, M. Okano, N. Brockdorff, M. Vidal, and H. Koseki. Polycomb group proteins Ring1A/B are functionally linked to the core transcriptional regulatory circuitry to maintain ES cell identity. *Development*, 135:1513–1524, Apr 2008.
- [4] R. S. Faustino, A. Chiriac, N. J. Niederlander, T. J. Nelson, A. Behfar, P. K. Mishra, S. Maccura, M. Michalak, A. Terzic, and C. Perez-Terzic. Decoded Calreticulin Deficient Embryonic Stem Cell Transcriptome Resolves Latent Cardiophenotype. *Stem Cells*, May 2010.



- [5] T. Fei, K. Xia, Z. Li, B. Zhou, S. Zhu, H. Chen, J. Zhang, Z. Chen, H. Xiao, J. D. Han, and Y. G. Chen. Genome-wide mapping of SMAD target genes reveals the role of BMP signaling in embryonic stem cell fate determination. *Genome Res.*, 20:36–44, Jan 2010.
- [6] K. E. Galvin, E. D. Travis, D. Yee, T. Magnuson, and J. L. Vivian. Nodal signaling regulates the bone morphogenic protein pluripotency pathway in mouse embryonic stem cells. *J. Biol. Chem.*, 285:19747–19756, Jun 2010.
- [7] M. Kanatsu-Shinohara, J. Lee, K. Inoue, N. Ogonuki, H. Miki, S. Toyokuni, M. Ikawa, T. Nakamura, A. Ogura, and T. Shinohara. Pluripotency of a single spermatogonial stem cell in mice. *Biol. Reprod.*, 78:681–687, Apr 2008.
- [8] J. B. Kim, V. Sebastiano, G. Wu, M. J. Arauzo-Bravo, P. Sasse, L. Gentile, K. Ko, D. Ruau, M. Ehrlich, D. van den Boom, J. Meyer, K. Hubner, C. Bernemann, C. Ortmeier, M. Zenke, B. K. Fleischmann, H. Zaehres, and H. R. Scholer. Oct4-induced pluripotency in adult neural stem cells. *Cell*, 136:411–419, Feb 2009.
- [9] J. B. Kim, H. Zaehres, G. Wu, L. Gentile, K. Ko, V. Sebastiano, M. J. Arauzo-Bravo, D. Ruau, D. W. Han, M. Zenke, and H. R. Scholer. Pluripotent stem cells induced from adult neural stem cells by reprogramming with two factors. *Nature*, 454:646–650, Jul 2008.
- [10] K. Ko, N. Tapia, G. Wu, J. B. Kim, M. J. Bravo, P. Sasse, T. Glaser, D. Ruau, D. W. Han, B. Greber, K. Hausdorfer, V. Sebastiano, M. Stehling, B. K. Fleischmann, O. Brustle, M. Zenke, and H. R. Scholer. Induction of pluripotency in adult unipotent germline stem cells. *Cell Stem Cell*, 5:87–96, Jul 2009.
- [11] K. Kurimoto, Y. Yabuta, Y. Ohinata, Y. Ono, K. D. Uno, R. G. Yamada, H. R. Ueda, and M. Saitou. An improved single-cell cDNA amplification method for efficient high-density oligonucleotide microarray analysis. *Nucleic Acids Res.*, 34:e42, 2006.
- [12] M. Leeb, D. Pasini, M. Novatchkova, M. Jaritz, K. Helin, and A. Wutz. Polycomb complexes act redundantly to repress genomic repeats and genes. *Genes Dev.*, 24:265–276, Feb 2010.
- [13] L. Liu, G. Z. Luo, W. Yang, X. Zhao, Q. Zheng, Z. Lv, W. Li, H. J. Wu, L. Wang, X. J. Wang, and Q. Zhou. Activation of the imprinted Dlk1-Dio3 region correlates with pluripotency levels of mouse stem cells. *J. Biol. Chem.*, 285:19483–19490, Jun 2010.
- [14] Y. H. Loh, Q. Wu, J. L. Chew, V. B. Vega, W. Zhang, X. Chen, G. Bourque, J. George, B. Leong, J. Liu, K. Y. Wong, K. W. Sung, C. W. Lee, X. D. Zhao, K. P. Chiu, L. Lipovich, V. A. Kuznetsov, P. Robson, L. W. Stanton, C. L. Wei, Y. Ruan, B. Lim, and H. H. Ng. The Oct4 and Nanog transcription network regulates pluripotency in mouse embryonic stem cells. *Nat. Genet.*, 38:431–440, Apr 2006.
- [15] B. Madan, V. Madan, O. Weber, P. Tropel, C. Blum, E. Kieffer, S. Viville, and H. J. Fehling. The pluripotency-associated gene Dppa4 is dispensable for embryonic stem cell identity and germ cell development but essential for embryogenesis. *Mol. Cell. Biol.*, 29:3186–3203, Jun 2009.
- [16] T. S. Mikkelsen, J. Hanna, X. Zhang, M. Ku, M. Wernig, P. Schorderet, B. E. Bernstein, R. Jaenisch, E. S. Lander, and A. Meissner. Dissecting direct reprogramming through integrative genomic analysis. *Nature*, 454:49–55, Jul 2008.
- [17] T. S. Mikkelsen, M. Ku, D. B. Jaffe, B. Issac, E. Lieberman, G. Giannoukos, P. Alvarez, W. Brockman, T. K. Kim, R. P. Koche, W. Lee, E. Mendenhall, A. O’Donovan, A. Presser, C. Russ, X. Xie, A. Meissner, M. Wernig, R. Jaenisch, C. Nusbaum, E. S. Lander, and B. E. Bernstein. Genome-wide maps of chromatin state in pluripotent and lineage-committed cells. *Nature*, 448:553–560, Aug 2007.

- [18] R. A. Miller, N. Christoforou, J. Pevsner, A. S. McCallion, and J. D. Gearhart. Efficient array-based identification of novel cardiac genes through differentiation of mouse ESCs. *PLoS ONE*, 3:e2176, 2008.
- [19] P. Sampath, D. K. Pritchard, L. Pabon, H. Reinecke, S. M. Schwartz, D. R. Morris, and C. E. Murry. A hierarchical network controls protein translation during murine embryonic stem cell self-renewal and differentiation. *Cell Stem Cell*, 2:448–460, May 2008.
- [20] L. Thorrez, K. Van Deun, L. C. Tranchevent, L. Van Lommel, K. Engelen, K. Marchal, Y. Moreau, I. Van Mechelen, and F. Schuit. Using ribosomal protein genes as reference: a tale of caution. *PLoS ONE*, 3:e1854, 2008.
- [21] N. R. Treff, R. K. Vincent, M. L. Budde, V. L. Browning, J. F. Magliocca, V. Kapur, and J. S. Odorico. Differentiation of embryonic stem cells conditionally expressing neurogenin 3. *Stem Cells*, 24:2529–2537, Nov 2006.
- [22] F. Ulloa-Montoya, B. L. Kidder, K. A. Pauwelyn, L. G. Chase, A. Luttun, A. Crabbe, M. Geeraerts, A. A. Sharov, Y. Piao, M. S. Ko, W. S. Hu, and C. M. Verfaillie. Comparative transcriptome analysis of embryonic and adult stem cells with extended and limited differentiation capacity. *Genome Biol.*, 8:R163, 2007.
